# Supplementary material
Source: Springer Nature journal article supplement (https://www.springermedizin.de/resource/supplementary/12908_2010_96_MOESM3_ESM.pdf/9525100)

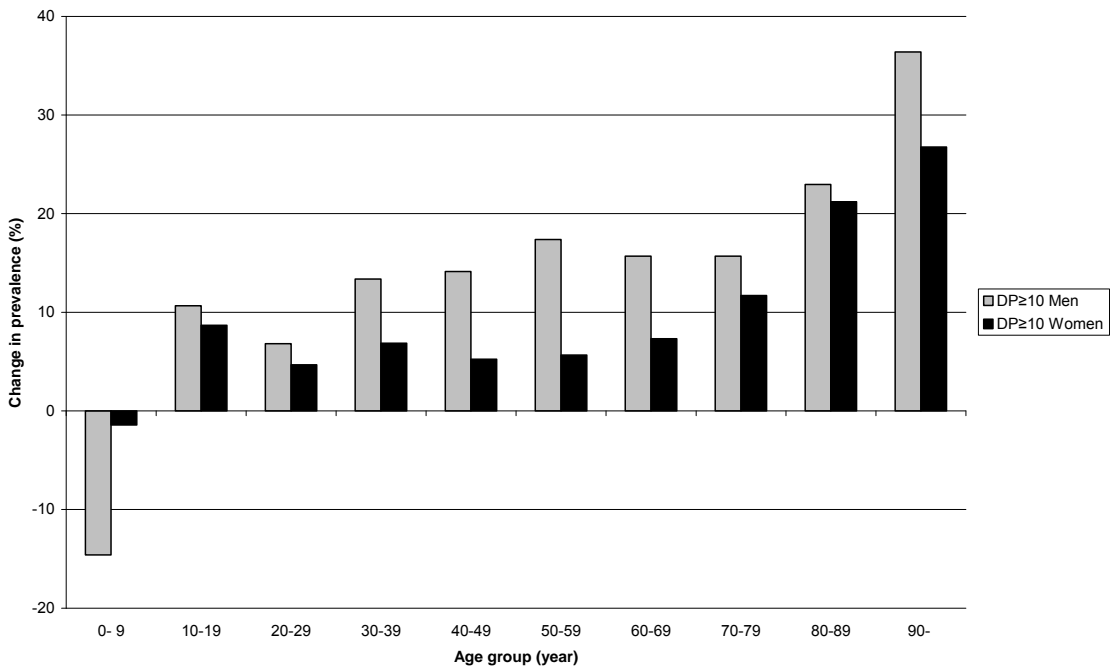

Supplement: MOESM3 [file 9525100]
